# Supplementary material
Source: publisher figshare collection journal article supplement (https://gsajournals.figshare.com/articles/dataset/_/13090076)
Supplement: Supplementary file 1 [file 1]

**Figure S2 Diagram of the Simulations**

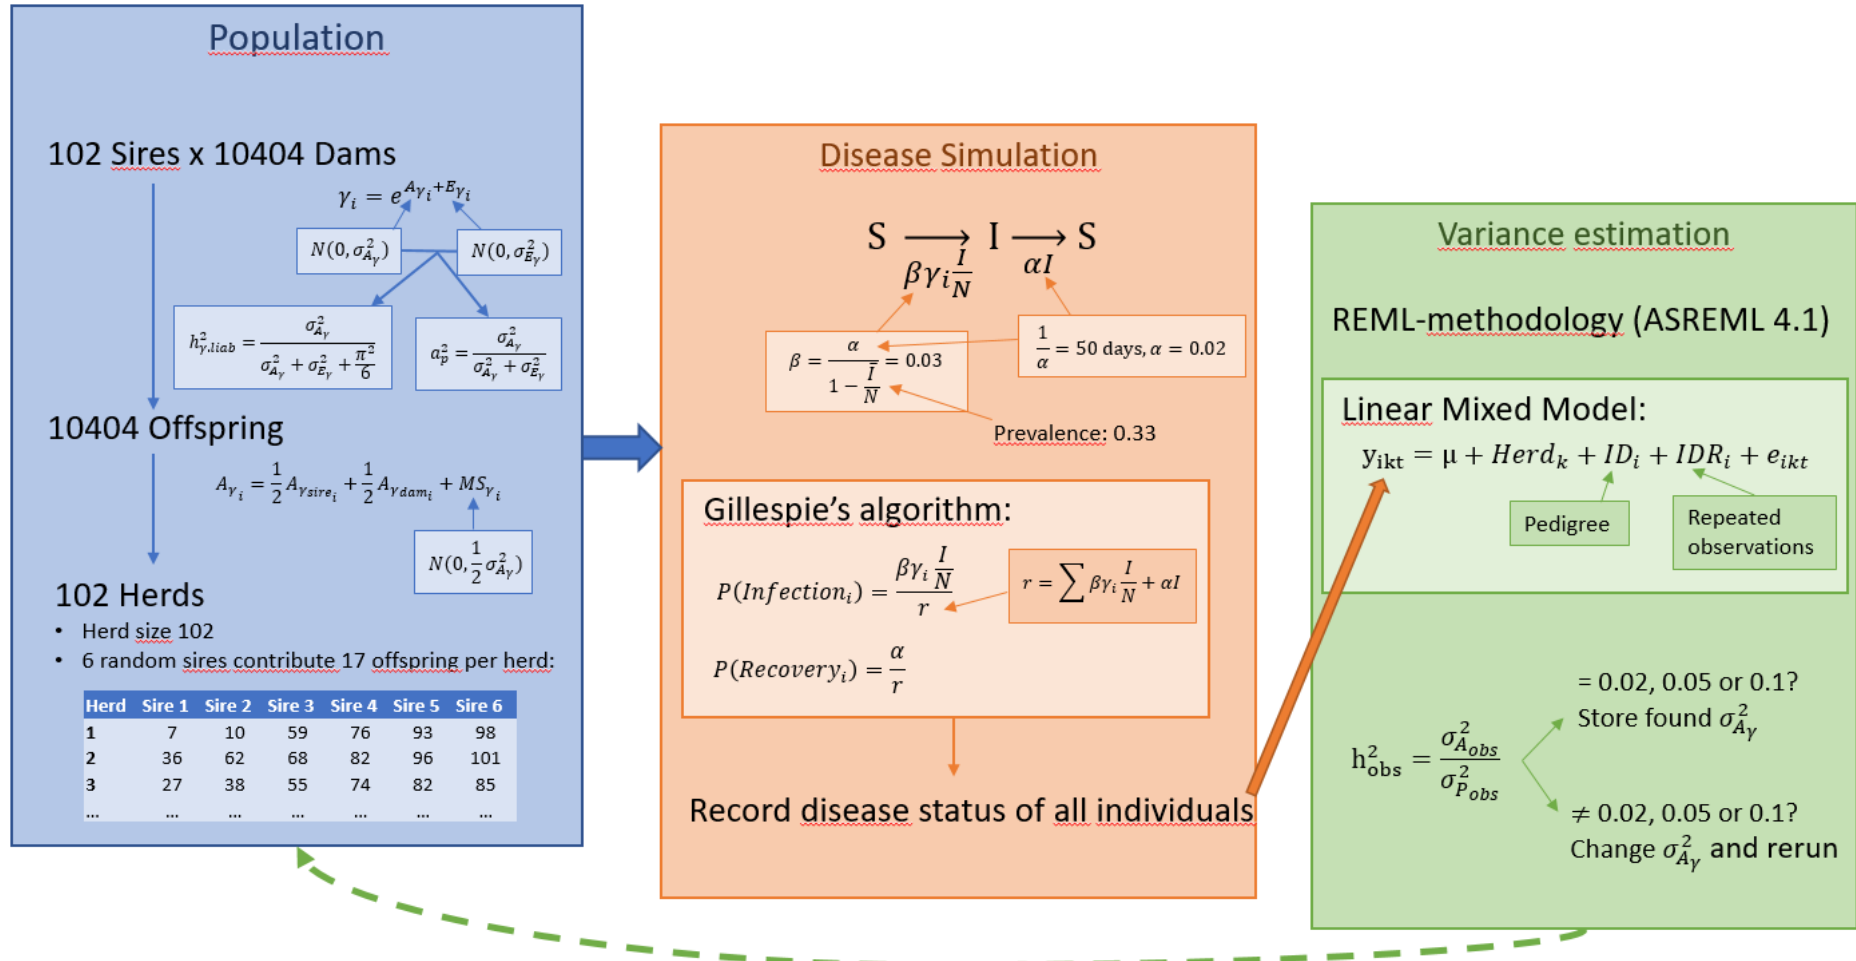

Schematic representation of the three steps of the simulations. See Table 1 in main text for definition of symbols.
